# Supplementary material
Source: PubMed Central journal article supplement (PMC9106921)
Supplement: NIHMS1792750-supplement-1792750_Sup_tables.pdf [file NIHMS1792750-supplement-1792750_Sup_tables.pdf]

| Data set | Molecule A | Molecule B | Mean in nm | Min in nm | Max in nm | Median in nm | Std.Dev in nm |
|----------|------------|------------|------------|-----------|-----------|--------------|---------------|
| 1        | LAG        | TCR        | 45.73      | 0.87      | 310.02    | 37.01        | 32.04         |
| 2        | LAG        | TCR        | 44.28      | 0.87      | 326.28    | 34.89        | 33.09         |
| 3        | LAG        | TCR        | 45.45      | 0.81      | 377.42    | 35.46        | 35.4          |
| 4        | LAG        | TCR        | 46.88      | 0.86      | 346.97    | 38.74        | 31.95         |
| 5        | LAG        | TCR        | 51.49      | 0.81      | 376.87    | 42.06        | 36.04         |
| 6        | LAG        | TCR        | 56.44      | 0.32      | 366.51    | 46.81        | 37.86         |
| 7        | LAG        | TCR        | 49.3       | 0.21      | 354.65    | 39.31        | 36.69         |
| 8        | LAG        | TCR        | 49.59      | 0.71      | 358.14    | 39.73        | 35.54         |
| 9        | LAG        | TCR        | 50.25      | 0.71      | 358.14    | 40.27        | 35.89         |
| 10       | LAG        | TCR        | 54.68      | 0.71      | 374.93    | 44.99        | 37.18         |
| 11       | LAG        | TCR        | 52.37      | 0.47      | 357.74    | 42.87        | 36.83         |
| 12       | LAG        | TCR        | 49.08      | 0.62      | 404.48    | 39.73        | 34.92         |
| 13       | LAG        | TCR        | 57.62      | 0.58      | 390.11    | 49.2         | 36.61         |
| 14       | LAG        | TCR        | 47.25      | 0.48      | 350.19    | 38.2         | 34.7          |
| 15       | LAG        | TCR        | 47.98      | 0.48      | 350.19    | 38.92        | 34.33         |
| 1        | LAG        | CD4        | 113.68     | 1.54      | 576.62    | 93.11        | 76.93         |
| 2        | LAG        | CD4        | 102.9      | 1.77      | 539.76    | 84.51        | 68.5          |
| 3        | LAG        | CD4        | 108.36     | 1.28      | 542.29    | 85.34        | 77.67         |
| 4        | LAG        | CD4        | 103.56     | 1.17      | 534.2     | 88.6         | 66.33         |
| 5        | LAG        | CD4        | 126.46     | 1.42      | 728.05    | 103.31       | 94.07         |
| 6        | LAG        | CD4        | 115.32     | 1.7       | 511.31    | 100.65       | 69.36         |
| 7        | LAG        | CD4        | 118.45     | 2.37      | 558.55    | 96.48        | 80.66         |
| 8        | LAG        | CD4        | 122.43     | 1.1       | 738.23    | 98.87        | 88.75         |
| 9        | LAG        | CD4        | 117.56     | 1.1       | 783.24    | 96.99        | 82.13         |
| 10       | LAG        | CD4        | 133.82     | 1.01      | 638.41    | 112.97       | 88.39         |
| 11       | LAG        | CD4        | 129.06     | 1.09      | 594.81    | 110.58       | 84.13         |
| 12       | LAG        | CD4        | 131.12     | 1.51      | 771.74    | 107.88       | 90.56         |
| 13       | LAG        | CD4        | 129.53     | 1.25      | 924.91    | 116.32       | 74.27         |
| 14       | LAG        | CD4        | 146.42     | 0.93      | 592.13    | 128.15       | 89.87         |
| 15       | LAG        | CD4        | 148.53     | 0.93      | 797.57    | 129.33       | 92.9          |

Supplementary Table 1: Summary of the shortest distance from LAG3 to TCR and CD4.

| Data Set | Percentage of excess zero counts of LAG3 in the vicinity of TCR | Mean count of the number of LAG3 in the vicinity of TCR | Percentage of excess zero counts of CD4 in the vicinity of TCR | Mean count of the number of CD4 in the vicinity of TCR |
|----------|-----------------------------------------------------------------|---------------------------------------------------------|----------------------------------------------------------------|--------------------------------------------------------|
| 1        | 38.44                                                           | 12.4273                                                 | 79.74%                                                         | 1.028348                                               |
| 2        | 38.82                                                           | 16.01264                                                | 79.08%                                                         | 1.246302                                               |
| 3        | 53.95                                                           | 17.06672                                                | 83.93%                                                         | 2.179631                                               |
| 4        | 46.27                                                           | 11.62417                                                | 82.00%                                                         | 0.883695                                               |
| 5        | 40.76                                                           | 13.07961                                                | 85.00%                                                         | 1.31678                                                |
| 6        | 43.39                                                           | 8.998224                                                | 84.27%                                                         | 0.911355                                               |
| 7        | 52.59                                                           | 16.4538                                                 | 82.51%                                                         | 0.941975                                               |
| 8        | 62.72                                                           | 14.37803                                                | 86.67%                                                         | 0.891791                                               |
| 9        | 60.8                                                            | 14.48868                                                | 84.78%                                                         | 0.855928                                               |
| 10       | 63.36                                                           | 10.76584                                                | 88.12%                                                         | 0.832506                                               |
| 11       | 51.08                                                           | 11.69271                                                | 83.40%                                                         | 1.845687                                               |
| 12       | 63.33                                                           | 13.39716                                                | 88.45%                                                         | 1.162308                                               |
| 13       | 45.5                                                            | 6.872539                                                | 90.93%                                                         | 7.604515                                               |
| 14       | 60.34                                                           | 16.33437                                                | 86.97%                                                         | 0.927899                                               |
| 15       | 58.45                                                           | 15.95207                                                | 86.80%                                                         | 0.925333                                               |

Supplementary Table 2: Percentage of excess zero counts and mean count of molecules of LAG3 in the vicinity of TCR and CD4 using zero-inflated Poisson regression

| LAG3 peptide | N                | $\Delta H$ (kcal/mol) | $-T\Delta S$ (kcal/mol/deg) | $\Delta G$ (kcal/mol) | $K_d$ ( $\mu M$ ) |
|--------------|------------------|-----------------------|-----------------------------|-----------------------|-------------------|
| Mouse EP     | $1.85 \pm 0.677$ | $0.169 \pm .008$      | $-6.41 \pm 0.212$           | $-6.24 \pm 0.205$     | $19.5 \pm 6.64$   |
| Human EP     | $2.21 \pm 0.133$ | $0.805 \pm 0.067$     | $-6.49 \pm 0.075$           | $-5.68 \pm 0.117$     | $49.5 \pm 8.95$   |
| Mouse DP     | $1.95 \pm 0.274$ | $0.584 \pm 0.005$     | $-6.11 \pm 0.089$           | $-5.53 \pm 0.891$     | $64.4 \pm 10.7$   |
| Mouse QP     | n.d.             | n.d.                  | n.d.                        | n.d.                  | n.d.              |
| Mouse EG     | $1.51 \pm 0.035$ | $0.256 \pm 30.10$     | $-6.42 \pm 0.144$           | $-6.17 \pm 0.174$     | $22.1 \pm 6.34$   |

Supplementary Table 3: The disordered cytoplasmic tail of LAG3 binds  $Zn^{2+}$  weakly, in an entropically driven thermodynamic process. ITC curves at 15°C of  $Zn^{2+}$  titrated into 75  $\mu M$  LAG3 peptides, in 10 mM Tris pH 7.0 buffer show that acidic residues are required for metal binding.
