# Supplementary material
Source: PubMed Central journal article supplement (PMC9106921)

# Source WB – Ext Figure 1e

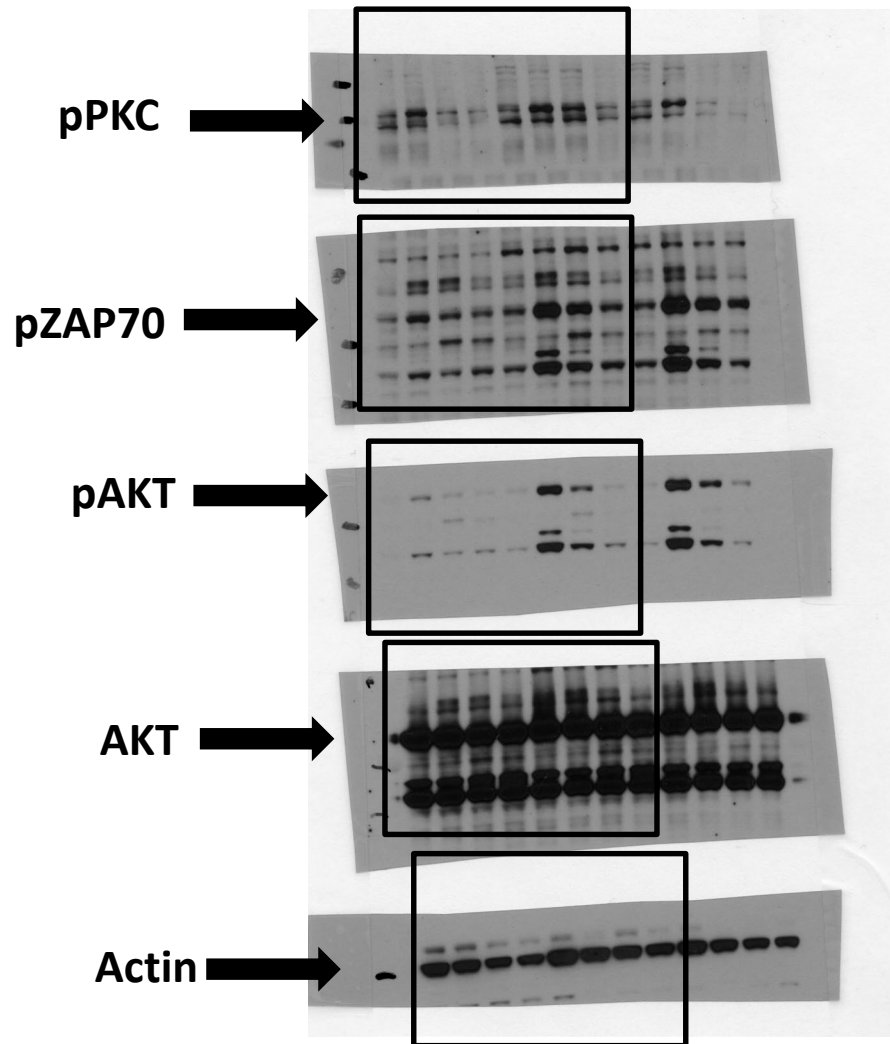

Supplement: NIHMS1792750-supplement-1792750_SD_ED_Fig_1.pdf [file NIHMS1792750-supplement-1792750_SD_ED_Fig_1.pdf]

# Source WB – Ext Figure2f

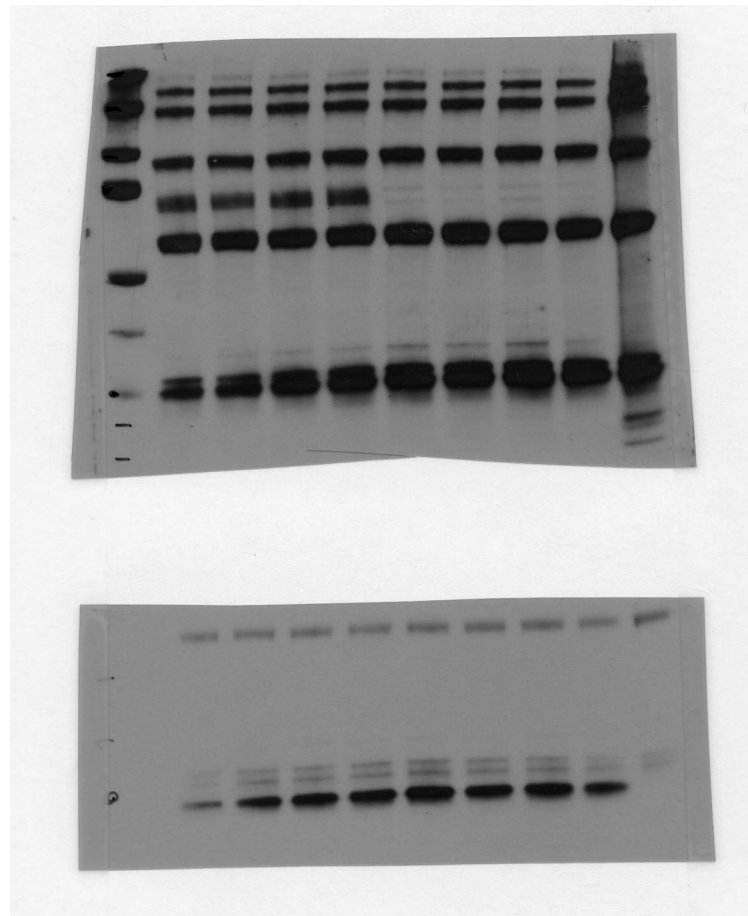

Supplement: NIHMS1792750-supplement-1792750_SD_ED_Fig_2.pdf [file NIHMS1792750-supplement-1792750_SD_ED_Fig_2.pdf]

# Source WB - Figure 2F

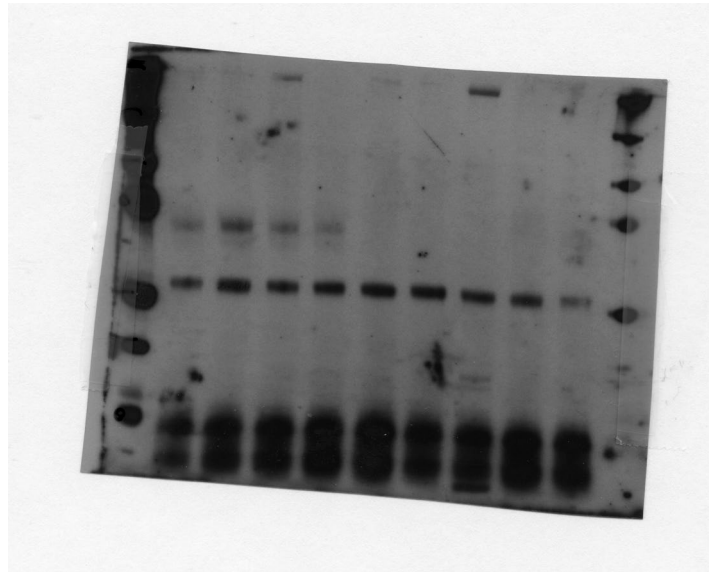

Supplement: NIHMS1792750-supplement-1792750_SD_Fig_2.pdf [file NIHMS1792750-supplement-1792750_SD_Fig_2.pdf]

# Source WB – Figure 4e

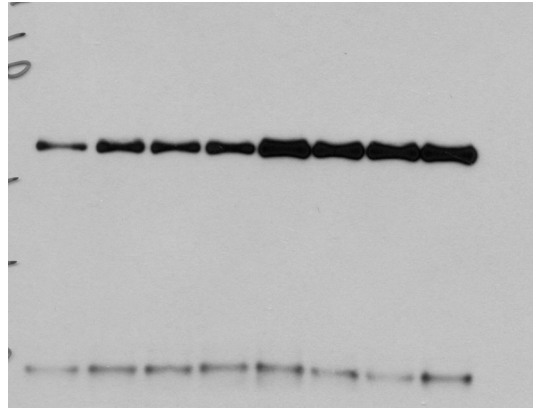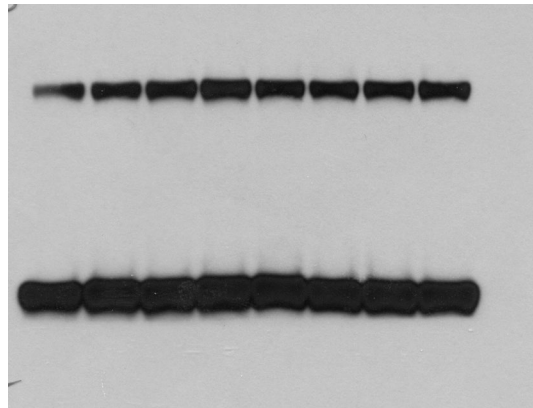

Supplement: NIHMS1792750-supplement-1792750_SD_Fig_4.pdf [file NIHMS1792750-supplement-1792750_SD_Fig_4.pdf]

# Source WB – Figure 5a

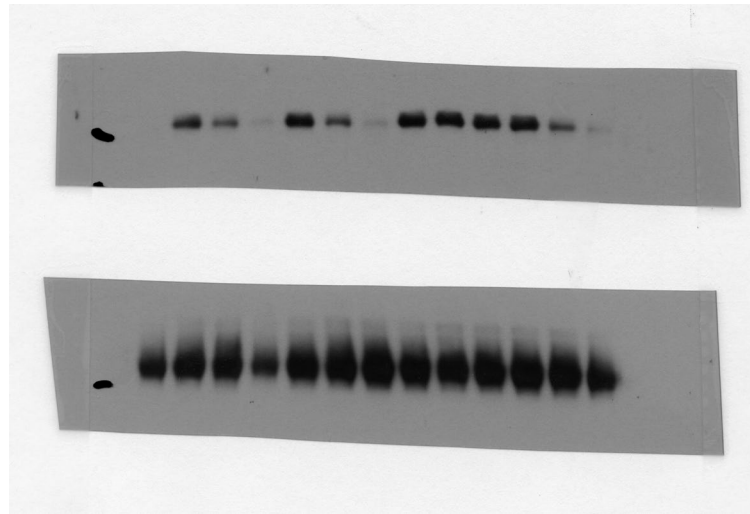

Supplement: NIHMS1792750-supplement-1792750_SD_Fig_5.pdf [file NIHMS1792750-supplement-1792750_SD_Fig_5.pdf]

# Source WB – Figure 6a

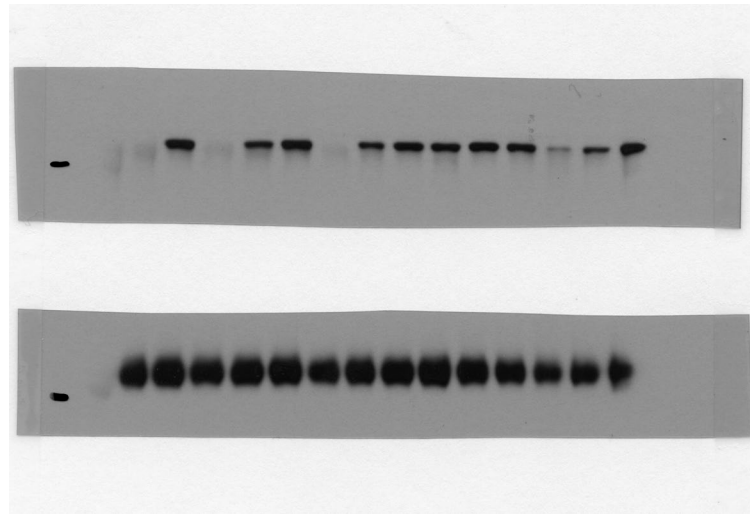

Supplement: NIHMS1792750-supplement-1792750_SD_Fig_6.pdf [file NIHMS1792750-supplement-1792750_SD_Fig_6.pdf]
